# Supplementary material for: Clay-supported graphene materials: application to hydrogen storage
Source: Royal Society of Chemistry journal article supplement (doi:10.1039/c3cp53258e), 2013-01-01
Supplement: c3cp53258e.pdf [file c3cp53258e.pdf]

**Electronic Supplementary Material (ESI)**

## Clay-supported graphene materials: application to hydrogen storage

**Cristina Ruiz-García<sup>a</sup>, Javier Pérez-Carvajal<sup>a</sup>, Angel Berenguer-Murcia<sup>b</sup>, Margarita Darder<sup>a</sup>, Pilar Aranda<sup>a</sup>, Diego Cazorla-Amorós<sup>b</sup>, Eduardo Ruiz-Hitzky<sup>\*a</sup>**

<sup>a</sup> Department of New Architectures in Materials Chemistry, Instituto de Ciencia de Materiales de Madrid CSIC, Calle Sor Juana Inés de la Cruz 3, E-2804, Madrid, Spain. Fax: +34 913720623; Tel: +34 913349000. E-mail: [eduardo@icmm.csic](mailto:eduardo@icmm.csic)

<sup>b</sup> Departamento de Química Inorgánica e Instituto Universitario de Materiales, Universidad de Alicante, Apartado 99, E-03080, Alicante, Spain. Fax: +34 96590345; Tel: +34965909350

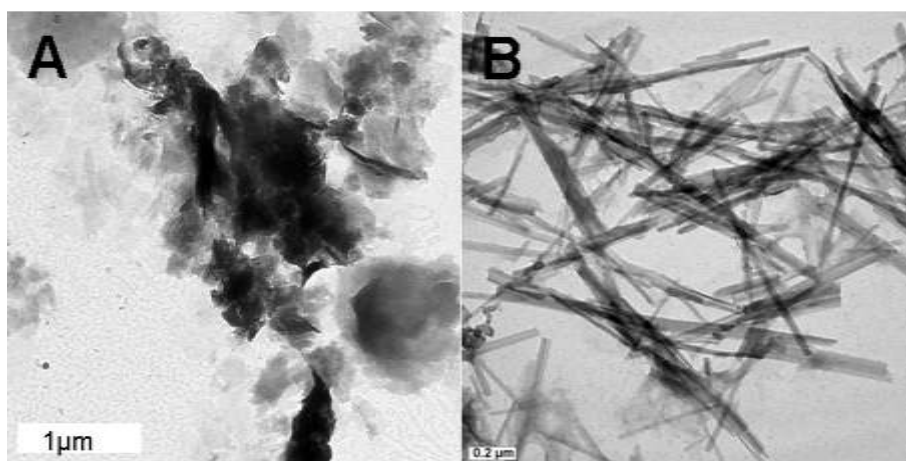

**Fig S1.** TEM images of starting clays A) montmorillonite, B) sepiolite

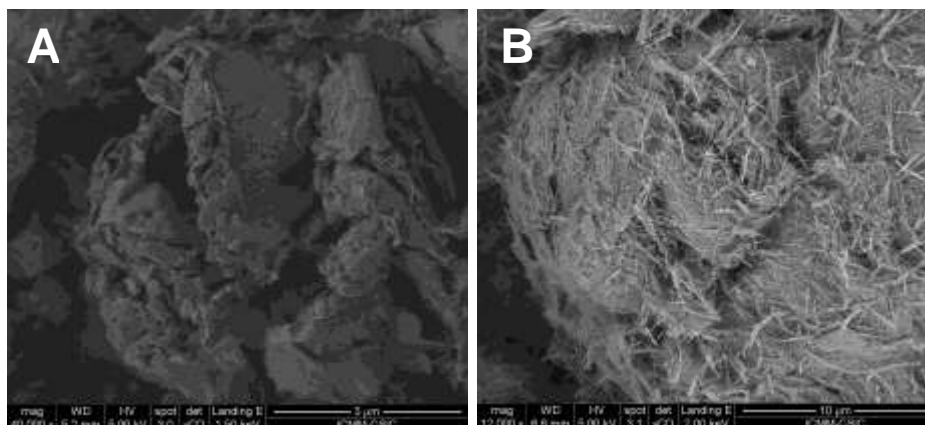

**Fig S2.** FE-SEM images of starting clays A) montmorillonite, B) sepiolite

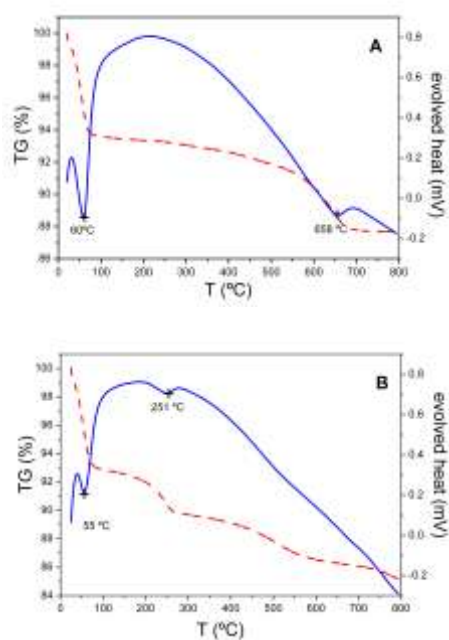

**Fig S3.** Thermogravimetric (—) and differential thermal analysis (---) of starting clays A) montmorillonite, B) sepiolite
